# Supplementary material
Source: publisher site journal article supplement (https://www.spandidos-publications.com/4977/downloadSupplementary)
Supplement: Supplementary file 1 [file downloadSupplementary]

## Sheet: DFS
Table SV. DFS in African-American and Hispanic patients.
Sample ID	Ethnicity	Subtype	DFS, months
35T	AA	TNBC	12
5T	Hisp	Luminal A	48
3T	Hisp	Her2	7
12T	AA	TNBC	48
17T	Hisp	Her2	48
11T	Hisp	Luminal A	38
14T	AA	Luminal A	84
13T	AA	Luminal A	48
6T	AA	Luminal A	72
24T	Hisp	Luminal A	42
22T	Hisp	Luminal A	60
66T	Hisp	TNBC	24
44T	AA	Luminal A	30
50T	Hisp	Luminal A	36
63T	AA	Luminal A	54
74T	AA	Luminal A	24
147T	AA	Her2	18
161T	Hisp	TNBC	24
140T	Hisp	TNBC	24
171T	Hisp	Luminal A	60
149T	Hisp	Luminal A	36
168T	Hisp	Her2	30
174T	AA	Luminal A	42
AA, African-American; DFS, disease-free survival; Hisp, Hispanic; TNBC, triple-negative breast cancer.
